# Supplementary material for: Highly multiplexed tissue imaging using repeated oligonucleotide exchange reaction
Source: PubMed Central journal article supplement (PMC8251877; doi:10.1002/eji.202048891), 2021-03-10
Supplement: EJI-51-1262-s001.pdf [file EJI-51-1262-s001.pdf]

## Supporting Information

Herein contains Supporting Information Figures 1-3 and Supporting Tables 1-2:

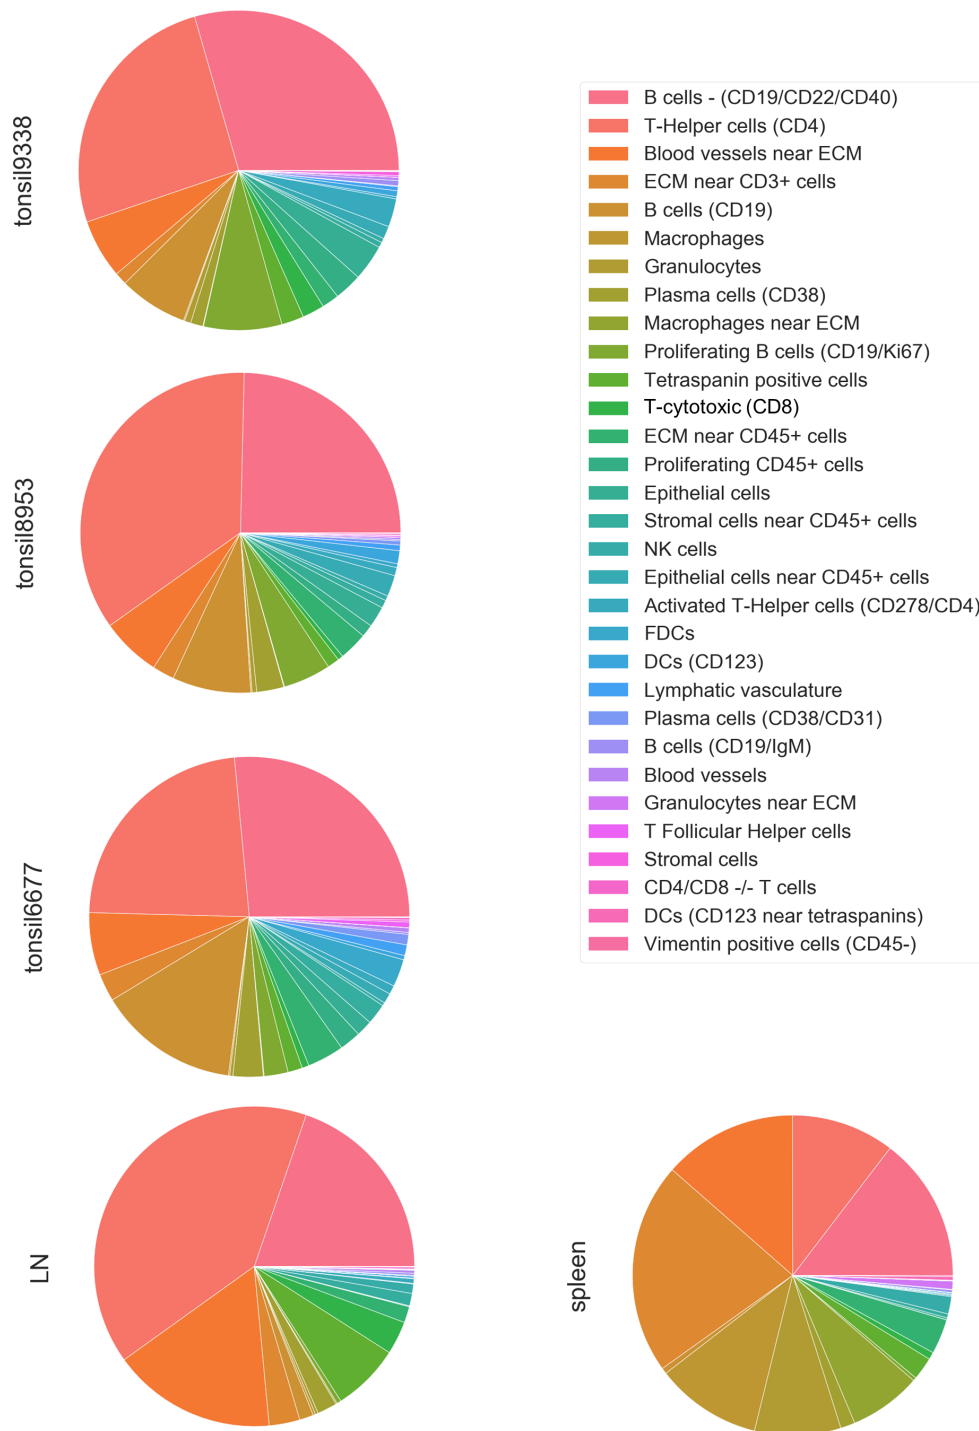

**Supporting Information Figure 1:** Pie charts of cell-type compositions for all tissues imaged.

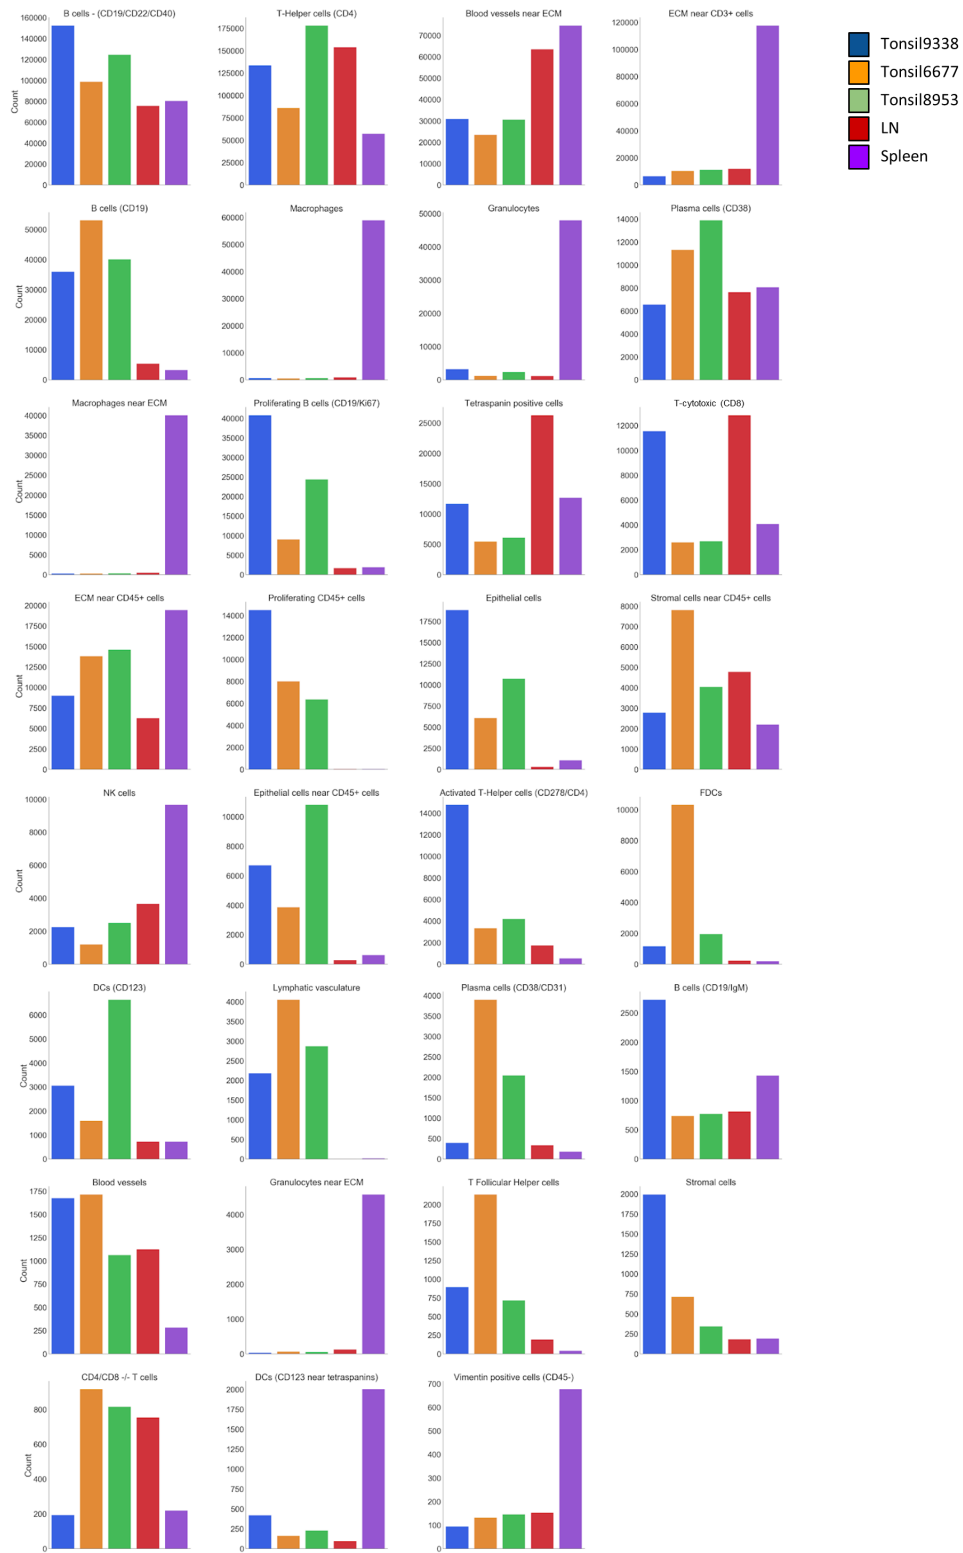

**Supporting Information Figure 2:** Bar graphs of the numbers of each cell type in all tissues imaged.

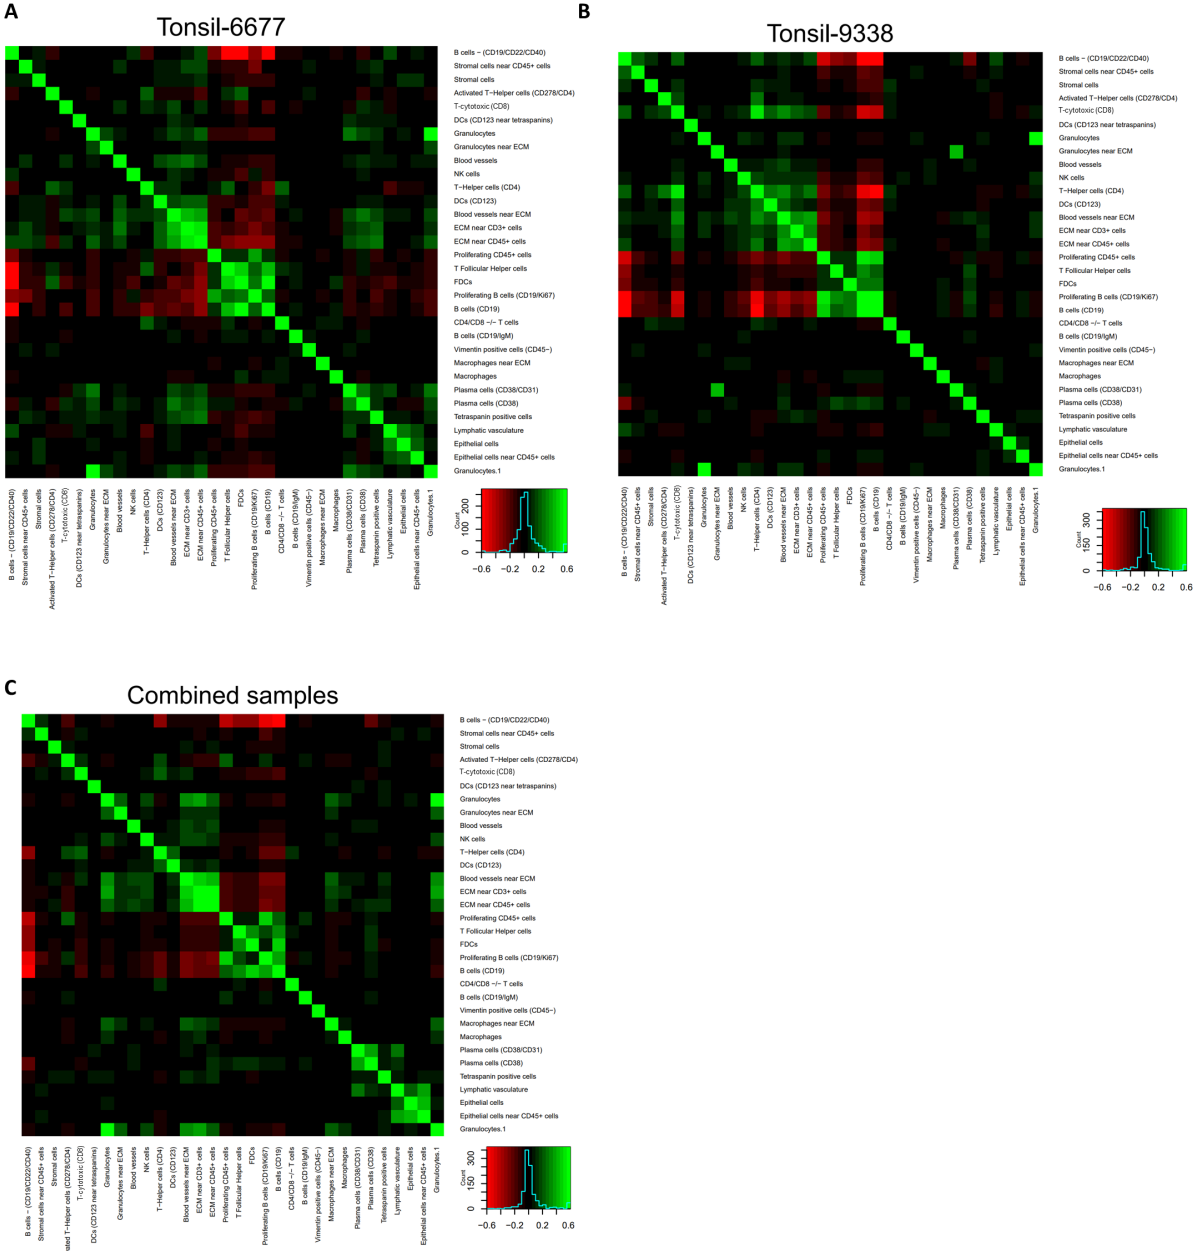

**Supporting Information Figure 3: Cell-cell density correlation analysis across lymphoid tissues determined by evaluating 100 x 100 pixel squares for (A) tonsil 6677, (B) tonsil 9338, and (C) all samples combined.**

**Supporting Table 1:** CODEX multicycle panel, order, oligo number, and antibody clones

|       | CH1     | A488     |       |           | Cy3         |       |             | Cy5        |       |           |
|-------|---------|----------|-------|-----------|-------------|-------|-------------|------------|-------|-----------|
| Cycle |         | antibody | oligo | clone     | antibody    | oligo | clone       | antibody   | oligo | clone     |
| 1     | Hoechst | CD38     | A2    | HIB7      | CD19        | A0    | HIB19       | CD31       | A1    | WM59      |
| 2     | Hoechst | Vimentin | A4    | RV202     | CD22        | A6    | HIB22       | Ki67       | A3    | B56       |
| 3     | Hoechst | CD8      | A5    | SK1       | CD90        | A7    | 5E10.00E+10 | CD123      | A9    | 7G3       |
| 4     | Hoechst | CD15     | A8    | HI98      | CD3         | B0    | UCHT1       | CD152      | B2    | BN13      |
| 5     | Hoechst | CD21     | B1    | Bu32      | cytokeratin | B3    | AE1/AE3     | CD2        | B4    | RPA-2.10  |
| 6     | Hoechst | CD66     | C4    | B1.1/CD66 | collagen IV | B6    | poly        | CD81       | B5    | 5A6       |
| 7     | Hoechst | HLA-DR   | C7    | L243      | CD57        | B9    | HCD57       | CD4        | B7    | A161A1    |
| 8     | Hoechst | CD7      | D8    | CD7-6B7   | CD278       | C2    | C398.4A     | podoplanin | C0    | NC-08     |
| 9     | Hoechst | CD45RA   | E2    | HI100     | CD34        | C3    | 561         | CD54       | C1    | HA58      |
| 10    | Hoechst | CD9      | E4    | HI9a      | IGM         | D0    | MHM-88      | CD117      | C5    | YB5.B6    |
| 11    | Hoechst |          |       |           | CD56        | D1    | HCD56       | CD279      | C8    | EH12.2H7  |
| 12    | Hoechst |          |       |           | CD45        | D6    | HI30        | CD49f      | D2    | GoH3      |
| 13    | Hoechst |          |       |           | CD5         | D7    | UCHT2       | CD16       | D3    | 3G8       |
| 14    | Hoechst |          |       |           | Ecadherin   | E6    | 2.40E+11    | FAPalpha   | D4    | BMS168    |
| 15    | Hoechst |          |       |           | CD63        | E7    | H5C6        | CD11b      | D9    | ICRF44    |
| 16    | Hoechst |          |       |           | CD1c        | F2    | L161        | CD40       | E0    | HB14      |
| 17    | Hoechst |          |       |           | CD274       | F3    | 29E.2A3     | CD27       | E1    | M-T271    |
| 18    | Hoechst |          |       |           |             |       |             | CD104      | F5    | 450-9D    |
| 19    | Hoechst |          |       |           |             |       |             | CD273      | F6    | 24F.10C12 |

**Supporting Table 2: CODEX Oligonucleotide sequences**

| Name | Top oligo sequence (5'-3')          | dye sequence      | Dye  | # in cross-validation |
|------|-------------------------------------|-------------------|------|-----------------------|
| A0   | ATAGCAGTCCAGTTGCTGATGGTTTAGGACTACGG | GTAGTCCTAAACCAT   | Cy3  | 2                     |
| A1   | ATAGCAGTCCAGGATAATAGTACTCCTCGCCGCAA | CGGCGAGGAGTA      | A488 | 3                     |
| A2   | ATAGCAGTCCAGGCCACTCTCCCATTAGTCGGAA  | CCGACTAATGGGAGA   | A488 | 1                     |
| A3   | ATAGCAGTCCAGCACAGGTGGATGTGTTACGATGG | ATCGTAACACATCCA   | Cy5  | 6                     |
| A4   | ATAGCAGTCCAGAGCCCGCTAAGATATTCTAAGTT | CTTAGAATATCTTAGCG | A488 | 4                     |
| A5   | ATAGCAGTCCAGGCGTAACGCAGATGAATATTCAA | GAATATTCTATCTGCG  | A488 | 7                     |
| A6   | ATAGCAGTCCAGATCGAAGGGTTATACACTCGTGG | ACGAGTGTATAACCC   | Cy3  | 5                     |
| A7   | ATAGCAGTCCAGCGATGGAGATTCAGTCTCTCGGG | CGAGAGACTGAATCT   | Cy3  | 8                     |
| A8   | ATAGCAGTCCAGCGAGCACTGTAATAGGCACTATT | TAGTGCCTATTACAG   | A488 | 10                    |
| A9   | ATAGCAGTCCAGGGAACAAAGCGGTCTTACGGTTT | ACCGTAAGACCGCTT   | Cy5  | 9                     |
| B0   | ATAGCAGTCCAGAATCGGATGTAGGATGGTCTCGG | GAGACCATCCTACAT   | Cy3  | 11                    |
| B1   | ATAGCAGTCCAGGTACCGACGTGCCGTTTCACTT  | GTGAAACGGCACG     | A488 | 13                    |
| B2   | ATAGCAGTCCAGCTTCGCGGTTTCCTCAGACACGG | GTGTCTGAGGAAACC   | Cy5  | 12                    |
| B3   | ATAGCAGTCCAGTTAAGAATAAGGGCTCATTGTTT | ACAATGAGCCCTTAT   | Cy3  | 14                    |
| B4   | ATAGCAGTCCAGAGGCAGAGGCACGCCCTTTAAA  | TAAAAGGGCGTGC     | Cy5  | 15                    |
| B5   | ATAGCAGTCCAGCGGATCCACTTGTCTAACCAATT | TTGGTTAGACAAGTG   | Cy5  | 18                    |
| B7   | ATAGCAGTCCAGTATGATTGGTCCACTAACGTAGG | TACGTTAGTGGACCA   | A488 | 24                    |
| B8   | ATAGCAGTCCAGCGCGTGATAGGGCATTGAAGGG  | CTTCAAATGCCCTAT   | Cy5  | 21                    |
| B9   | ATAGCAGTCCAGCCGTACACATGAGCGAATCAGG  | TGATTCGCTCATGTG   | Cy3  | 20                    |
| C0   | ATAGCAGTCCAGAACGACTACCAAATCCTGATG   | CATCAGGATTTGGTA   | Cy5  | 27                    |
| C1   | ATAGCAGTCCAGCTATTATCATGAGGAGCGGGC   | CGCTCCTCATGATAA   | Cy5  | 30                    |
| C2   | ATAGCAGTCCAGGTGTCCACCTACACAATGCTA   | TAGCATTGTGTAGGT   | Cy3  | 23                    |
| C3   | ATAGCAGTCCAGCGCATTGCGTCTACTTATAAG   | CTTATAAGTAGACGC   | Cy3  | 26                    |
| C4   | ATAGCAGTCCAGTACTGTATGAGTAGTAATCT    | AGATTACTACTATACA  | A488 | 16                    |

|           |                                        |                     |      |    |
|-----------|----------------------------------------|---------------------|------|----|
| <b>C5</b> | ATAGCAGTCCAGGCTACCTCTAAGTCAGAGAGC      | GCTCTCTGACTTAGA     | Cy5  | 33 |
| <b>C6</b> | ATAGCAGTCCAGGCTCGTGACATTATCCGTGAT      | ATCACGGATAATGTC     | A488 | 19 |
| <b>C7</b> | ATAGCAGTCCAGTTTCTCACTACTATTAGTACT      | AGTACTAATAGTAGTGA   | A488 | 22 |
| <b>C8</b> | ATAGCAGTCCAGCCTTGTTTCGCCAGAATGCCA      | TGGCATTCTGGC        | Cy5  | 36 |
| <b>C9</b> | ATAGCAGTCCAGCTCTTCCGACTCGAACCTGAG      | CTCAGGTTTCGAGTC     | A488 | 25 |
| <b>D0</b> | ATAGCAGTCCAGCATGGCCTGCACGGCAAAGTG      | CACTTTGCCGTGC       | Cy3  | 29 |
| <b>D1</b> | ATAGCAGTCCAGATGGCAATAACGCCTCGTATC      | GATACGAGGCGTTAT     | Cy3  | 32 |
| <b>D2</b> | ATAGCAGTCCAGTCCGTCTCCGTGCGGGAAAAT      | ATTTTCCCGCACG       | Cy5  | 39 |
| <b>D3</b> | ATAGCAGTCCAGATACTAACCAGGTGATTGCAT      | ATGCAATCACCTGGT     | Cy5  | 42 |
| <b>D4</b> | ATAGCAGTCCAGGCGCACTATCCCGTAAACTTC      | GAAGTTTACGGGATA     | Cy5  | 45 |
| <b>D5</b> | ATAGCAGTCCAGTCAAGGCAGGTCAACTCGCAC      | GTGCGAGTTGACCT      | Cy3  | 35 |
| <b>D6</b> | ATAGCAGTCCAGAGTGAGGGTCACATGGTCGTT      | AACGACCATGTGACC     | Cy3  | 38 |
| <b>D7</b> | ATAGCAGTCCAGAGAAGTGCGGATTTTCTATTT      | AAATACGAAATCCGC     | Cy3  | 41 |
| <b>D8</b> | ATAGCAGTCCAGGCAGCTCGTCAGTACTTTTCA      | CTGAAAGTACTGACG     | A488 | 28 |
| <b>D9</b> | ATAGCAGTCCAGGTGACGCTTATTATGGACTTC      | GAAGTCCATAATAAGC    | Cy5  | 48 |
| <b>E0</b> | ATAGCAGTCCAGGTGTAAACAAAAGTCTGTCTG      | CGACAGCAGTTTTGT     | Cy5  | 51 |
| <b>E1</b> | ATAGCAGTCCAGGTGAATTCTTATTCCCGAATA      | TATTCGGGAATAAGA     | Cy5  | 53 |
| <b>E2</b> | ATAGCAGTCCAGGAAGCCTAGGGGAACAGGTTG      | CAACCTGTTCCCTA      | A488 | 31 |
| <b>E3</b> | ATAGCAGTCCAGGTTTAATTAGCTTAAGAGAGT      | ACTCTCTTAAGCTAATT   | A488 | 34 |
| <b>E4</b> | ATAGCAGTCCAGACGTTGATAAATATTTTACAGAGT   | ACTCTGTAAAATATTTATC | A488 | 37 |
| <b>E5</b> | ATAGCAGTCCAGACTCGCGATGTACGTGCTTTGGTT   | AACCAAAGCACGTA      | A488 | 40 |
| <b>E6</b> | ATAGCAGTCCAGAGCGGAGTTGCCGACGACGAAGGC   | GCCTTCGTCTGTC       | Cy3  | 44 |
| <b>E7</b> | ATAGCAGTCCAGCAAGGAGATGCTTCTTGTGGAACC   | GGTTCCACAAGAAG      | Cy3  | 47 |
| <b>E8</b> | ATAGCAGTCCAGCAATACATACGTGGCCCGGCAGTT   | AACTGCCGGG          | A488 | 43 |
| <b>E9</b> | ATAGCAGTCCAGCCCCTTGCCAACCAAAGTACCG     | CGGTCAGTTTGGTT      | A488 | 46 |
| <b>F0</b> | ATAGCAGTCCAGCCGGTTGAGCGTGTACCCCCAGC    | GCTGGGGGTGA         | Cy3  | 50 |
| <b>F1</b> | ATAGCAGTCCAGCGACGGCGCGACAACGCGACGGAT   | ATCCGTCTCGGTT       | A488 | 49 |
| <b>F2</b> | ATAGCAGTCCAGCTCTTATCACATTTGCTTCGACGA   | TCGTCTGAAGCAAAT     | Cy3  | 52 |
| <b>F3</b> | ATAGCAGTCCAGCTGTCTGGGGTCTGCTTGGGTGTTTA | TAAACACCCAAGCG      | Cy3  | 54 |

|           |                                       |                    |     |    |
|-----------|---------------------------------------|--------------------|-----|----|
| <b>F4</b> | ATAGCAGTCCAGGACGCTGGGATCTGTCCGGTCGTCA | TGACGACCGACAG      | Cy5 | 55 |
| <b>F5</b> | ATAGCAGTCCAGGAGGTCATTTCAACAAATATTGTT  | AACAATATTTGTTGAAAT | Cy5 | 56 |
| <b>F6</b> | ATAGCAGTCCAGTCTTAATGAATGGCCGGAAGTGGT  | ACCACTTCCGGC       | Cy5 | 57 |
| <b>F7</b> | ATAGCAGTCCAGTGGTCCCCAGACGCCGGGGCACCA  | TGGTGCCCCG         | Cy5 | 58 |
| <b>F8</b> | ATAGCAGTCCAGTTTTCTATCGCAAGGAACTACCGA  | TCGGTAGTTCCTTG     | Cy5 | 59 |
